# Supplementary material for: Towards defining the core Saccharum microbiome: input from five genotypes
Source: PubMed Central journal article supplement (PMC9358853; doi:10.1186/s12866-022-02598-8), 2022-08-08
Supplement: 12866_2022_2598_MOESM2_ESM.pdf [file 12866_2022_2598_MOESM2_ESM.pdf]

**Supplemental Table S1** – Total number of trimmed reads and percent alignment to chloroplast and mitochondria genomes.

|           |      | Chloroplast   |         |         |         | Mitochondria  |         |         |         |
|-----------|------|---------------|---------|---------|---------|---------------|---------|---------|---------|
|           |      | Aligned reads |         |         |         | Aligned reads |         |         |         |
|           |      | forward       |         | reverse |         | forward       |         | reverse |         |
| Leaves    | Endo | 244480        | (17.7%) | 223941  | (18.1%) | 804478        | (58.2%) | 634143  | (51.3%) |
|           | Exo  | 18279         | (1.4%)  | 16957   | (1.4%)  | 87100         | (6.7%)  | 151996  | (12.9%) |
| Stem      | Endo | 216685        | (12.0%) | 198996  | (12.4%) | 1449544       | (80.2%) | 1214015 | (75.7%) |
|           | Exo  | 34722         | (2.3%)  | 33616   | (2.4%)  | 426106        | (28.1%) | 375094  | (26.8%) |
| Root      | Endo | 868           | (0.1%)  | 1186    | (0.1%)  | 108640        | (10.5%) | 24483   | (2.5%)  |
|           | Exo  | 1719          | (0.2%)  | 1895    | (0.2%)  | 5645          | (0.6%)  | 3820    | (0.5%)  |
| bulk soil |      | 1040          | (0.4%)  | 1049    | (0.5%)  | 406           | (0.2%)  | 238     | (0.1%)  |

**Supplemental Table S2** – Total number of filtered, merged, and non-chimeric sequences by DADA2 denoise software.

|           |      | input sequences | filtered sequences | percentage of input passed the filter | merged  | percentage of merged sequences | non-chimeric sequences | percentage of input non-chimeric |
|-----------|------|-----------------|--------------------|---------------------------------------|---------|--------------------------------|------------------------|----------------------------------|
| Leaves    | Endo | 1667666         | 646315             | 38.8%                                 | 588565  | 35.3%                          | 535149                 | 32.1%                            |
|           | Exo  | 1385405         | 541294             | 39.1%                                 | 478064  | 34.5%                          | 470594                 | 34.0%                            |
| Stem      | Endo | 2017452         | 796841             | 39.5%                                 | 751176  | 37.2%                          | 685153                 | 34.0%                            |
|           | Exo  | 1727798         | 730743             | 42.3%                                 | 689366  | 39.9%                          | 651548                 | 37.7%                            |
| Root      | Endo | 1236001         | 447073             | 36.2%                                 | 343321  | 27.8%                          | 323264                 | 26.2%                            |
|           | Exo  | 1060996         | 369250             | 34.8%                                 | 241843  | 22.8%                          | 234588                 | 22.1%                            |
| bulk soil |      | 277222          | 94275              | 34.0%                                 | 63738   | 23.0%                          | 59994                  | 21.6%                            |
| Total     |      | 9372540         | 3625791            |                                       | 3156073 |                                | 2960290                |                                  |
